# Supplementary material for: Analysis of the characteristics of global virtual water trade network using degree and eigenvector centrality, with a focus on food and feed crops
Source: Copernicus journal article supplement (doi:10.5194/hess-2016-211), 2016-05-23
Supplement: Supplementary file [file hess-2016-211-AC2-supplement.zip]

## **Reviewer #2**

| <b>Major Comments 1</b> |                                        |                                                                                                                                                                                                                                                                                                                                                                                                                                                                                                                                                                                                                                                                                                                                                                                                                                                                                                                                                                                                                                                                                                                                                                                                                                                                                                                                                                                                                                                                                                                                                                                                                                                                                                                                                                                                                                                                                                                                                                                                                                                                                                                              |
|-------------------------|----------------------------------------|------------------------------------------------------------------------------------------------------------------------------------------------------------------------------------------------------------------------------------------------------------------------------------------------------------------------------------------------------------------------------------------------------------------------------------------------------------------------------------------------------------------------------------------------------------------------------------------------------------------------------------------------------------------------------------------------------------------------------------------------------------------------------------------------------------------------------------------------------------------------------------------------------------------------------------------------------------------------------------------------------------------------------------------------------------------------------------------------------------------------------------------------------------------------------------------------------------------------------------------------------------------------------------------------------------------------------------------------------------------------------------------------------------------------------------------------------------------------------------------------------------------------------------------------------------------------------------------------------------------------------------------------------------------------------------------------------------------------------------------------------------------------------------------------------------------------------------------------------------------------------------------------------------------------------------------------------------------------------------------------------------------------------------------------------------------------------------------------------------------------------|
| Reviewer's comments     |                                        | <p>In introduction, the author provides a good review on previously literature. However it is not clear how this paper builds on this rich literature. In particular, how does this paper contribute to the literature? What's the novelty of the paper? Why it is vital to look at food crops and feed crops?</p>                                                                                                                                                                                                                                                                                                                                                                                                                                                                                                                                                                                                                                                                                                                                                                                                                                                                                                                                                                                                                                                                                                                                                                                                                                                                                                                                                                                                                                                                                                                                                                                                                                                                                                                                                                                                           |
| Response                |                                        | <p>We added more explanation about literature reviews. In addition, we tried to mention the novelty of this paper with a focus on the connectivity, vulnerable importers, and influential countries in the GVWT. We tried to show the importance of division into food and feed crops in GVWT, and added crops information in new chapter; 2.4 Data for international trade and water footprint of study crops.</p>                                                                                                                                                                                                                                                                                                                                                                                                                                                                                                                                                                                                                                                                                                                                                                                                                                                                                                                                                                                                                                                                                                                                                                                                                                                                                                                                                                                                                                                                                                                                                                                                                                                                                                          |
|                         | page 3, line 3<br>-<br>page 3, line 20 | <p>Generally, studies related to virtual water trade considered more structural change in the entire trade network, and the volume of trade in each country. From these studies, we could understand that a trade network has become complicated, and determine which countries have exported or imported the largest amount of virtual water. However, we need to understand which countries are vulnerable or influential in GVWT, in order to set a sustainable food trade and water management plan. In addition, crops could be divided into food and feed crops, even if there is not an exact standard for classifying them, because the trade structure of food crops, which are mainly used for food, such as wheat, barley, and rice, has different characteristics from feed crops, such as maize (corn) and beans. The main areas of production and consumption vary greatly according to whether they are for food or feed crops. In addition, feed crops are hardly substituted by food crops, and the impacts of food or feed crop trade on food security or water security might differ.</p> <p>Therefore, in this study, we considered both the volume and connectivity in GVWT through the application of network centrality. In addition, GVWT during the period 2006-2010 of food and feed crops, respectively, was estimated, and the characteristics of GVWT were analyzed with a focus on the connectivity, vulnerable importers, and influential countries in GVWT. The degree centrality of the GVWT network was computed to evaluate the connectivity of each country, and then vulnerable importers were classified according to connectivity and volume of GVWT. A vulnerable structure in importers indicated low connectivity with a large amount of virtual water imported, and could cause water shortage problem in importers. We also analyzed the influential traders of GVWT using eigenvector centrality, which is a measure of the importance and influence of a country on the whole network. The change of VWT in influential countries could strongly affect the other traders.</p> |

| Major Comments 2    |                                                               |                                                                                                                                                                                                                                                                                                                                                                                                                                                                                                                                                                                                                                                                                                                                                                                                                                                                                                                                                                                                                                                                                                                                                                                                                                                                                                                                                                                                                                                                                                                                                                                                                                                                                                                                                                                                                                                                                                                                                                                                                                                                                                                                                                                                                                                                                                                                                                                                                                                                                                                                                                                                                                                                                                                                                                                                                                                                                                                                                                                                                                                                                                                                                                                                                                                                                                                        |
|---------------------|---------------------------------------------------------------|------------------------------------------------------------------------------------------------------------------------------------------------------------------------------------------------------------------------------------------------------------------------------------------------------------------------------------------------------------------------------------------------------------------------------------------------------------------------------------------------------------------------------------------------------------------------------------------------------------------------------------------------------------------------------------------------------------------------------------------------------------------------------------------------------------------------------------------------------------------------------------------------------------------------------------------------------------------------------------------------------------------------------------------------------------------------------------------------------------------------------------------------------------------------------------------------------------------------------------------------------------------------------------------------------------------------------------------------------------------------------------------------------------------------------------------------------------------------------------------------------------------------------------------------------------------------------------------------------------------------------------------------------------------------------------------------------------------------------------------------------------------------------------------------------------------------------------------------------------------------------------------------------------------------------------------------------------------------------------------------------------------------------------------------------------------------------------------------------------------------------------------------------------------------------------------------------------------------------------------------------------------------------------------------------------------------------------------------------------------------------------------------------------------------------------------------------------------------------------------------------------------------------------------------------------------------------------------------------------------------------------------------------------------------------------------------------------------------------------------------------------------------------------------------------------------------------------------------------------------------------------------------------------------------------------------------------------------------------------------------------------------------------------------------------------------------------------------------------------------------------------------------------------------------------------------------------------------------------------------------------------------------------------------------------------------------|
| Reviewer's comments |                                                               | <p>In discussion part, more deep analysis comparing your results with other papers is needed.</p> <p>Are the results similar as those in previous papers?</p> <p>Are there some papers to support your conclusions?</p> <p>Are there some unique features in network of food crops and feed crops, when comparing to that of total crops? Why they are different?</p> <p>For example, P5 L12-19 discusses GVWTs by crops, which have been calculated in Table 3 in Konar et al. (2011). It might not be helpful to replicate previous works.</p>                                                                                                                                                                                                                                                                                                                                                                                                                                                                                                                                                                                                                                                                                                                                                                                                                                                                                                                                                                                                                                                                                                                                                                                                                                                                                                                                                                                                                                                                                                                                                                                                                                                                                                                                                                                                                                                                                                                                                                                                                                                                                                                                                                                                                                                                                                                                                                                                                                                                                                                                                                                                                                                                                                                                                                       |
| Response            |                                                               | We tried to explain deeper discussion with comparison to other research.                                                                                                                                                                                                                                                                                                                                                                                                                                                                                                                                                                                                                                                                                                                                                                                                                                                                                                                                                                                                                                                                                                                                                                                                                                                                                                                                                                                                                                                                                                                                                                                                                                                                                                                                                                                                                                                                                                                                                                                                                                                                                                                                                                                                                                                                                                                                                                                                                                                                                                                                                                                                                                                                                                                                                                                                                                                                                                                                                                                                                                                                                                                                                                                                                                               |
|                     | <p>page 7,<br/>line 8</p> <p>-</p> <p>page 7,<br/>line 34</p> | <p>Considering the out-degree centrality of GVWT for food crops, the U.S.A. displays expanded connectivity with various importers, followed by Asian countries, such as Thailand, Pakistan, Vietnam, and India. Ukraine also had high connectivity to various importers characterized by large amounts of virtual water export. These countries play the main role for virtual water supply in the GVWT. In contrast, the Russian Federation, Kazakhstan, and Australia had lower connectivity, even though they exported a lot of virtual water by the food crops trade. Considering the out-degree centrality of the GVWT for feed crops, the exporters who exported a lot of virtual water had high connectivity as well. For example, the U.S.A., Brazil, and Argentina had high ranks in both the volume and connectivity of GVWT. These countries exported the largest amount of virtual water to eastern Asian countries, such as China, Japan, and The Republic of Korea, but also had various connections with importers. Konar et al. (2011) aggregated the virtual water trade of 5 crops and 3 animal products, and measured the node degree of the virtual water trade, which indicated the number of trade partners. They found that the U.S.A., the Netherlands, France, Italy, and the U.K. were the top 5 exporters who had large connections. On the other hand, China and Thailand were the only Asian countries in the top 15 exporters according to the number of connections. However, in this study, we found that Pakistan, India, and Vietnam also had high connectivity in virtual water export through food crops, because we analyzed the connectivity of the virtual water trade of food and feed crops, respectively.</p> <p>In-degree centrality indicated the connection of virtual water import according to the importer's perspective. Therefore, the importer with a high rank of in-degree centrality imports virtual water from various exporters, and this means that this importer has a robust trade structure. Therefore, if the importer has a low rank of in-degree centrality with a larger volume of virtual water import, this importer might be highly dependent on just a few exporters. For example, Egypt and Japan imported a lot of virtual water by food crops trade, but the rank of in-degree centrality was 21st and 33rd, respectively. Actually, Egypt imported over 50% of wheat from only the U.S.A. and Russian Federation. In terms of feed crops trade, most virtual water was imported to China, but the connectivity was very low. In contrast, the Netherlands, Spain, and Germany had high ranks in both the volume and connectivity of virtual water import through the feed crops trade, and these results indicate that these countries have robust trade structures. In fact, the European countries have a robust internal trade network with various connections among European countries. Konar et al. (2011) also found that the U.S.A., U.K., Germany, Canada, and Netherlands were the top 5 importers. On the other hand, Saudi Arabia and Hong Kong were the only Asian countries in the top 15 importers. These results were similar to this study; for example, European countries had higher connectivity than Asian countries.</p> |

### Minor Comments 1-2

| Reviewer's comments                           |                                                                                                                                                                                                                                                                                                                                                                                                                                                                                                                                                                                                                                                                                                                                                                                                                                                                                                                                                                                                                                                                                                                                                                                                                                                                                                                                                                                                                                                                                                                                                                                                                                                                                                                                                                                                                                                                                                                                                                                                                                                                                                                                                                                                                                                                                                                                                                                                                                                                                                                                                                                                                                                                                                              | Please define “food crops” and “feed crops”.<br>What specific crop types do they cover?<br>Section2: Please add one subsection about data source, and provide more details.<br>For example, what is the unit of the data? What commodities the trade data provide? |                                     |  |                                   |                               |            |       |        |       |        |             |      |        |                                   |        |                      |        |                                    |        |              |        |        |        |        |        |          |        |                |        |     |        |               |            |       |        |              |        |                   |             |        |                           |        |                       |        |            |        |                                     |
|-----------------------------------------------|--------------------------------------------------------------------------------------------------------------------------------------------------------------------------------------------------------------------------------------------------------------------------------------------------------------------------------------------------------------------------------------------------------------------------------------------------------------------------------------------------------------------------------------------------------------------------------------------------------------------------------------------------------------------------------------------------------------------------------------------------------------------------------------------------------------------------------------------------------------------------------------------------------------------------------------------------------------------------------------------------------------------------------------------------------------------------------------------------------------------------------------------------------------------------------------------------------------------------------------------------------------------------------------------------------------------------------------------------------------------------------------------------------------------------------------------------------------------------------------------------------------------------------------------------------------------------------------------------------------------------------------------------------------------------------------------------------------------------------------------------------------------------------------------------------------------------------------------------------------------------------------------------------------------------------------------------------------------------------------------------------------------------------------------------------------------------------------------------------------------------------------------------------------------------------------------------------------------------------------------------------------------------------------------------------------------------------------------------------------------------------------------------------------------------------------------------------------------------------------------------------------------------------------------------------------------------------------------------------------------------------------------------------------------------------------------------------------|--------------------------------------------------------------------------------------------------------------------------------------------------------------------------------------------------------------------------------------------------------------------|-------------------------------------|--|-----------------------------------|-------------------------------|------------|-------|--------|-------|--------|-------------|------|--------|-----------------------------------|--------|----------------------|--------|------------------------------------|--------|--------------|--------|--------|--------|--------|--------|----------|--------|----------------|--------|-----|--------|---------------|------------|-------|--------|--------------|--------|-------------------|-------------|--------|---------------------------|--------|-----------------------|--------|------------|--------|-------------------------------------|
| Response                                      |                                                                                                                                                                                                                                                                                                                                                                                                                                                                                                                                                                                                                                                                                                                                                                                                                                                                                                                                                                                                                                                                                                                                                                                                                                                                                                                                                                                                                                                                                                                                                                                                                                                                                                                                                                                                                                                                                                                                                                                                                                                                                                                                                                                                                                                                                                                                                                                                                                                                                                                                                                                                                                                                                                              | We added the sub-section about data source, and explained the types of crops, data source, and unit of the data in this section.                                                                                                                                   |                                     |  |                                   |                               |            |       |        |       |        |             |      |        |                                   |        |                      |        |                                    |        |              |        |        |        |        |        |          |        |                |        |     |        |               |            |       |        |              |        |                   |             |        |                           |        |                       |        |            |        |                                     |
| page 5,<br>line 10<br>-<br>page 5,<br>line 33 | <p><b>2.4 Data for international trade and water footprint of study crops</b></p> <p>In this study, we compared the GVWT of food and feed crops, because food crops, such as wheat and rice, might have different trade characteristics from feed crops, such as maize and soybeans. For example, Konar et al. (2011) found the number of links and average degree of corn and soy were smaller than those of other food crops, such as wheat, barley, and rice. Although there is no exact classification for food and feed crops, food crops generally indicate crops for food, and representative crops are wheat, barley, and rice. Feed crops indicate crops that are cultivated primarily for animal feed, and the representative crops are maize (corn) and soybeans. In particular, East Asian countries such as China, Japan, and Korea have used maize and beans for animal feed. In this study, food crops included wheat, rice, barley, potatoes, sweet potatoes, rye, and grain sorghum. The feed crops included maize and beans crops. Table 1 lists specific crops.</p> <p>Country-scale import and export data of various commodities for every 5 years could be obtained from the Personal Computer Trade Analysis System (PC-TAS) produced by the United Nations Statistics Division (UNSD). These data are based on the Commodity Trade Statistics Data Base (COMTRADE) of the UNSD. According to the World Meteorological Organization report (WMO, 2013), there were several significant events related to food trade during 2000-2010. For example, Australia suffered severe drought damage in 2007, but the drought was solved in 2009, and Australia was noticeable as a main exporter in 2010. In addition, the Russian federation had the worst drought, and the government decided to stop exporting wheat, barley, and maize. This action could affect Middle East countries, and also the entire crop trade. We expected the global virtual water trade in these seasons could be important issues, and collected international trade data of food and feed crops during 2006-2010 from PC-TAS.</p> <p>The water footprint is defined as the total volume of water consumed within the territory of the nation. Mekonnen and Hoekstra (2010) quantified the average values of green and blue water footprints of crops and crop products at national and sub-national levels from 1996 to 2005. The water footprint data indicated the representative index using average value. Therefore, we applied the average value of water footprint during the period 1996-2005 from Mekonnen and Hoekstra (2010), even though this study focused on crop trade from 2006 to 2010.</p> |                                                                                                                                                                                                                                                                    |                                     |  |                                   |                               |            |       |        |       |        |             |      |        |                                   |        |                      |        |                                    |        |              |        |        |        |        |        |          |        |                |        |     |        |               |            |       |        |              |        |                   |             |        |                           |        |                       |        |            |        |                                     |
|                                               | <p><b>Table 1: Study crops for food and feed crops.</b></p> <table><tr><th colspan="2">Crops</th><th>Harmonized System Codes (HS Code)</th><th>Description of crop commodity</th></tr><tr><td rowspan="10">Food Crops</td><td rowspan="2">Wheat</td><td>100190</td><td>Wheat</td></tr><tr><td>100110</td><td>Durum wheat</td></tr><tr><td rowspan="4">Rice</td><td>100610</td><td>Rice in the husk (paddy or rough)</td></tr><tr><td>100620</td><td>Rice, husked (brown)</td></tr><tr><td>100630</td><td>Rice, semi-milled or wholly milled</td></tr><tr><td>100640</td><td>Rice, broken</td></tr><tr><td>Barley</td><td>100300</td><td>Barley</td></tr><tr><td rowspan="4">Others</td><td>070190</td><td>Potatoes</td></tr><tr><td>071420</td><td>Sweet potatoes</td></tr><tr><td>100200</td><td>Rye</td></tr><tr><td>100700</td><td>Grain sorghum</td></tr><tr><td rowspan="6">Feed crops</td><td rowspan="2">Maize</td><td>100590</td><td>Maize (corn)</td></tr><tr><td>100510</td><td>Maize (corn) seed</td></tr><tr><td rowspan="4">Beans crops</td><td>071332</td><td>Beans, small red (Adzuki)</td></tr><tr><td>071390</td><td>Leguminous vegetables</td></tr><tr><td>120100</td><td>Soya beans</td></tr><tr><td>230400</td><td>Soya-bean oil-cake &amp; solid residues</td></tr></table>                                                                                                                                                                                                                                                                                                                                                                                                                                                                                                                                                                                                                                                                                                                                                                                                                                                                                                                                                                                                                                                                                                                                                                                                                                                                                                                                                                                                             |                                                                                                                                                                                                                                                                    | Crops                               |  | Harmonized System Codes (HS Code) | Description of crop commodity | Food Crops | Wheat | 100190 | Wheat | 100110 | Durum wheat | Rice | 100610 | Rice in the husk (paddy or rough) | 100620 | Rice, husked (brown) | 100630 | Rice, semi-milled or wholly milled | 100640 | Rice, broken | Barley | 100300 | Barley | Others | 070190 | Potatoes | 071420 | Sweet potatoes | 100200 | Rye | 100700 | Grain sorghum | Feed crops | Maize | 100590 | Maize (corn) | 100510 | Maize (corn) seed | Beans crops | 071332 | Beans, small red (Adzuki) | 071390 | Leguminous vegetables | 120100 | Soya beans | 230400 | Soya-bean oil-cake & solid residues |
| Crops                                         |                                                                                                                                                                                                                                                                                                                                                                                                                                                                                                                                                                                                                                                                                                                                                                                                                                                                                                                                                                                                                                                                                                                                                                                                                                                                                                                                                                                                                                                                                                                                                                                                                                                                                                                                                                                                                                                                                                                                                                                                                                                                                                                                                                                                                                                                                                                                                                                                                                                                                                                                                                                                                                                                                                              | Harmonized System Codes (HS Code)                                                                                                                                                                                                                                  | Description of crop commodity       |  |                                   |                               |            |       |        |       |        |             |      |        |                                   |        |                      |        |                                    |        |              |        |        |        |        |        |          |        |                |        |     |        |               |            |       |        |              |        |                   |             |        |                           |        |                       |        |            |        |                                     |
| Food Crops                                    | Wheat                                                                                                                                                                                                                                                                                                                                                                                                                                                                                                                                                                                                                                                                                                                                                                                                                                                                                                                                                                                                                                                                                                                                                                                                                                                                                                                                                                                                                                                                                                                                                                                                                                                                                                                                                                                                                                                                                                                                                                                                                                                                                                                                                                                                                                                                                                                                                                                                                                                                                                                                                                                                                                                                                                        | 100190                                                                                                                                                                                                                                                             | Wheat                               |  |                                   |                               |            |       |        |       |        |             |      |        |                                   |        |                      |        |                                    |        |              |        |        |        |        |        |          |        |                |        |     |        |               |            |       |        |              |        |                   |             |        |                           |        |                       |        |            |        |                                     |
|                                               |                                                                                                                                                                                                                                                                                                                                                                                                                                                                                                                                                                                                                                                                                                                                                                                                                                                                                                                                                                                                                                                                                                                                                                                                                                                                                                                                                                                                                                                                                                                                                                                                                                                                                                                                                                                                                                                                                                                                                                                                                                                                                                                                                                                                                                                                                                                                                                                                                                                                                                                                                                                                                                                                                                              | 100110                                                                                                                                                                                                                                                             | Durum wheat                         |  |                                   |                               |            |       |        |       |        |             |      |        |                                   |        |                      |        |                                    |        |              |        |        |        |        |        |          |        |                |        |     |        |               |            |       |        |              |        |                   |             |        |                           |        |                       |        |            |        |                                     |
|                                               | Rice                                                                                                                                                                                                                                                                                                                                                                                                                                                                                                                                                                                                                                                                                                                                                                                                                                                                                                                                                                                                                                                                                                                                                                                                                                                                                                                                                                                                                                                                                                                                                                                                                                                                                                                                                                                                                                                                                                                                                                                                                                                                                                                                                                                                                                                                                                                                                                                                                                                                                                                                                                                                                                                                                                         | 100610                                                                                                                                                                                                                                                             | Rice in the husk (paddy or rough)   |  |                                   |                               |            |       |        |       |        |             |      |        |                                   |        |                      |        |                                    |        |              |        |        |        |        |        |          |        |                |        |     |        |               |            |       |        |              |        |                   |             |        |                           |        |                       |        |            |        |                                     |
|                                               |                                                                                                                                                                                                                                                                                                                                                                                                                                                                                                                                                                                                                                                                                                                                                                                                                                                                                                                                                                                                                                                                                                                                                                                                                                                                                                                                                                                                                                                                                                                                                                                                                                                                                                                                                                                                                                                                                                                                                                                                                                                                                                                                                                                                                                                                                                                                                                                                                                                                                                                                                                                                                                                                                                              | 100620                                                                                                                                                                                                                                                             | Rice, husked (brown)                |  |                                   |                               |            |       |        |       |        |             |      |        |                                   |        |                      |        |                                    |        |              |        |        |        |        |        |          |        |                |        |     |        |               |            |       |        |              |        |                   |             |        |                           |        |                       |        |            |        |                                     |
|                                               |                                                                                                                                                                                                                                                                                                                                                                                                                                                                                                                                                                                                                                                                                                                                                                                                                                                                                                                                                                                                                                                                                                                                                                                                                                                                                                                                                                                                                                                                                                                                                                                                                                                                                                                                                                                                                                                                                                                                                                                                                                                                                                                                                                                                                                                                                                                                                                                                                                                                                                                                                                                                                                                                                                              | 100630                                                                                                                                                                                                                                                             | Rice, semi-milled or wholly milled  |  |                                   |                               |            |       |        |       |        |             |      |        |                                   |        |                      |        |                                    |        |              |        |        |        |        |        |          |        |                |        |     |        |               |            |       |        |              |        |                   |             |        |                           |        |                       |        |            |        |                                     |
|                                               |                                                                                                                                                                                                                                                                                                                                                                                                                                                                                                                                                                                                                                                                                                                                                                                                                                                                                                                                                                                                                                                                                                                                                                                                                                                                                                                                                                                                                                                                                                                                                                                                                                                                                                                                                                                                                                                                                                                                                                                                                                                                                                                                                                                                                                                                                                                                                                                                                                                                                                                                                                                                                                                                                                              | 100640                                                                                                                                                                                                                                                             | Rice, broken                        |  |                                   |                               |            |       |        |       |        |             |      |        |                                   |        |                      |        |                                    |        |              |        |        |        |        |        |          |        |                |        |     |        |               |            |       |        |              |        |                   |             |        |                           |        |                       |        |            |        |                                     |
|                                               | Barley                                                                                                                                                                                                                                                                                                                                                                                                                                                                                                                                                                                                                                                                                                                                                                                                                                                                                                                                                                                                                                                                                                                                                                                                                                                                                                                                                                                                                                                                                                                                                                                                                                                                                                                                                                                                                                                                                                                                                                                                                                                                                                                                                                                                                                                                                                                                                                                                                                                                                                                                                                                                                                                                                                       | 100300                                                                                                                                                                                                                                                             | Barley                              |  |                                   |                               |            |       |        |       |        |             |      |        |                                   |        |                      |        |                                    |        |              |        |        |        |        |        |          |        |                |        |     |        |               |            |       |        |              |        |                   |             |        |                           |        |                       |        |            |        |                                     |
|                                               | Others                                                                                                                                                                                                                                                                                                                                                                                                                                                                                                                                                                                                                                                                                                                                                                                                                                                                                                                                                                                                                                                                                                                                                                                                                                                                                                                                                                                                                                                                                                                                                                                                                                                                                                                                                                                                                                                                                                                                                                                                                                                                                                                                                                                                                                                                                                                                                                                                                                                                                                                                                                                                                                                                                                       | 070190                                                                                                                                                                                                                                                             | Potatoes                            |  |                                   |                               |            |       |        |       |        |             |      |        |                                   |        |                      |        |                                    |        |              |        |        |        |        |        |          |        |                |        |     |        |               |            |       |        |              |        |                   |             |        |                           |        |                       |        |            |        |                                     |
|                                               |                                                                                                                                                                                                                                                                                                                                                                                                                                                                                                                                                                                                                                                                                                                                                                                                                                                                                                                                                                                                                                                                                                                                                                                                                                                                                                                                                                                                                                                                                                                                                                                                                                                                                                                                                                                                                                                                                                                                                                                                                                                                                                                                                                                                                                                                                                                                                                                                                                                                                                                                                                                                                                                                                                              | 071420                                                                                                                                                                                                                                                             | Sweet potatoes                      |  |                                   |                               |            |       |        |       |        |             |      |        |                                   |        |                      |        |                                    |        |              |        |        |        |        |        |          |        |                |        |     |        |               |            |       |        |              |        |                   |             |        |                           |        |                       |        |            |        |                                     |
|                                               |                                                                                                                                                                                                                                                                                                                                                                                                                                                                                                                                                                                                                                                                                                                                                                                                                                                                                                                                                                                                                                                                                                                                                                                                                                                                                                                                                                                                                                                                                                                                                                                                                                                                                                                                                                                                                                                                                                                                                                                                                                                                                                                                                                                                                                                                                                                                                                                                                                                                                                                                                                                                                                                                                                              | 100200                                                                                                                                                                                                                                                             | Rye                                 |  |                                   |                               |            |       |        |       |        |             |      |        |                                   |        |                      |        |                                    |        |              |        |        |        |        |        |          |        |                |        |     |        |               |            |       |        |              |        |                   |             |        |                           |        |                       |        |            |        |                                     |
| 100700                                        |                                                                                                                                                                                                                                                                                                                                                                                                                                                                                                                                                                                                                                                                                                                                                                                                                                                                                                                                                                                                                                                                                                                                                                                                                                                                                                                                                                                                                                                                                                                                                                                                                                                                                                                                                                                                                                                                                                                                                                                                                                                                                                                                                                                                                                                                                                                                                                                                                                                                                                                                                                                                                                                                                                              | Grain sorghum                                                                                                                                                                                                                                                      |                                     |  |                                   |                               |            |       |        |       |        |             |      |        |                                   |        |                      |        |                                    |        |              |        |        |        |        |        |          |        |                |        |     |        |               |            |       |        |              |        |                   |             |        |                           |        |                       |        |            |        |                                     |
| Feed crops                                    | Maize                                                                                                                                                                                                                                                                                                                                                                                                                                                                                                                                                                                                                                                                                                                                                                                                                                                                                                                                                                                                                                                                                                                                                                                                                                                                                                                                                                                                                                                                                                                                                                                                                                                                                                                                                                                                                                                                                                                                                                                                                                                                                                                                                                                                                                                                                                                                                                                                                                                                                                                                                                                                                                                                                                        | 100590                                                                                                                                                                                                                                                             | Maize (corn)                        |  |                                   |                               |            |       |        |       |        |             |      |        |                                   |        |                      |        |                                    |        |              |        |        |        |        |        |          |        |                |        |     |        |               |            |       |        |              |        |                   |             |        |                           |        |                       |        |            |        |                                     |
|                                               |                                                                                                                                                                                                                                                                                                                                                                                                                                                                                                                                                                                                                                                                                                                                                                                                                                                                                                                                                                                                                                                                                                                                                                                                                                                                                                                                                                                                                                                                                                                                                                                                                                                                                                                                                                                                                                                                                                                                                                                                                                                                                                                                                                                                                                                                                                                                                                                                                                                                                                                                                                                                                                                                                                              | 100510                                                                                                                                                                                                                                                             | Maize (corn) seed                   |  |                                   |                               |            |       |        |       |        |             |      |        |                                   |        |                      |        |                                    |        |              |        |        |        |        |        |          |        |                |        |     |        |               |            |       |        |              |        |                   |             |        |                           |        |                       |        |            |        |                                     |
|                                               | Beans crops                                                                                                                                                                                                                                                                                                                                                                                                                                                                                                                                                                                                                                                                                                                                                                                                                                                                                                                                                                                                                                                                                                                                                                                                                                                                                                                                                                                                                                                                                                                                                                                                                                                                                                                                                                                                                                                                                                                                                                                                                                                                                                                                                                                                                                                                                                                                                                                                                                                                                                                                                                                                                                                                                                  | 071332                                                                                                                                                                                                                                                             | Beans, small red (Adzuki)           |  |                                   |                               |            |       |        |       |        |             |      |        |                                   |        |                      |        |                                    |        |              |        |        |        |        |        |          |        |                |        |     |        |               |            |       |        |              |        |                   |             |        |                           |        |                       |        |            |        |                                     |
|                                               |                                                                                                                                                                                                                                                                                                                                                                                                                                                                                                                                                                                                                                                                                                                                                                                                                                                                                                                                                                                                                                                                                                                                                                                                                                                                                                                                                                                                                                                                                                                                                                                                                                                                                                                                                                                                                                                                                                                                                                                                                                                                                                                                                                                                                                                                                                                                                                                                                                                                                                                                                                                                                                                                                                              | 071390                                                                                                                                                                                                                                                             | Leguminous vegetables               |  |                                   |                               |            |       |        |       |        |             |      |        |                                   |        |                      |        |                                    |        |              |        |        |        |        |        |          |        |                |        |     |        |               |            |       |        |              |        |                   |             |        |                           |        |                       |        |            |        |                                     |
|                                               |                                                                                                                                                                                                                                                                                                                                                                                                                                                                                                                                                                                                                                                                                                                                                                                                                                                                                                                                                                                                                                                                                                                                                                                                                                                                                                                                                                                                                                                                                                                                                                                                                                                                                                                                                                                                                                                                                                                                                                                                                                                                                                                                                                                                                                                                                                                                                                                                                                                                                                                                                                                                                                                                                                              | 120100                                                                                                                                                                                                                                                             | Soya beans                          |  |                                   |                               |            |       |        |       |        |             |      |        |                                   |        |                      |        |                                    |        |              |        |        |        |        |        |          |        |                |        |     |        |               |            |       |        |              |        |                   |             |        |                           |        |                       |        |            |        |                                     |
|                                               |                                                                                                                                                                                                                                                                                                                                                                                                                                                                                                                                                                                                                                                                                                                                                                                                                                                                                                                                                                                                                                                                                                                                                                                                                                                                                                                                                                                                                                                                                                                                                                                                                                                                                                                                                                                                                                                                                                                                                                                                                                                                                                                                                                                                                                                                                                                                                                                                                                                                                                                                                                                                                                                                                                              | 230400                                                                                                                                                                                                                                                             | Soya-bean oil-cake & solid residues |  |                                   |                               |            |       |        |       |        |             |      |        |                                   |        |                      |        |                                    |        |              |        |        |        |        |        |          |        |                |        |     |        |               |            |       |        |              |        |                   |             |        |                           |        |                       |        |            |        |                                     |

| <b>Minor Comments 3</b> |                                                         |                                                                                                                                                                                                                                                                                                                                                                                                                                                                                                                                                                                                                                                                                                                                                                                                                                                                                                                                                                                                                                                                                                                                                                                                                                                                                                                                                                                                                             |
|-------------------------|---------------------------------------------------------|-----------------------------------------------------------------------------------------------------------------------------------------------------------------------------------------------------------------------------------------------------------------------------------------------------------------------------------------------------------------------------------------------------------------------------------------------------------------------------------------------------------------------------------------------------------------------------------------------------------------------------------------------------------------------------------------------------------------------------------------------------------------------------------------------------------------------------------------------------------------------------------------------------------------------------------------------------------------------------------------------------------------------------------------------------------------------------------------------------------------------------------------------------------------------------------------------------------------------------------------------------------------------------------------------------------------------------------------------------------------------------------------------------------------------------|
| Reviewer's comments     |                                                         | <p>P5 L9-11: This make no sense. When calculating virtual water trade (VWT), we multiply CT by WFP (i.e. Equation (2) in P3 L20). Take the log, and we get <math>\log(\text{VWT}) = \log(\text{CT}) + \log(\text{WFP})</math>. In Figure 1, the slope between <math>\log(\text{VWT})</math> and <math>\log(\text{CT})</math> should be 1. The only reason for the diffusion is <math>\log(\text{WFP})</math>, which is dependent on climate features in exporting country.</p> <p>The diffusion in Figure 1(b) is larger than that in Figure 1(a). That is because the variance of WFP for blue water is larger than that for green water.</p>                                                                                                                                                                                                                                                                                                                                                                                                                                                                                                                                                                                                                                                                                                                                                                              |
| Response                |                                                         | <p>We tried to explain the variability of green and blue water export rather than the volume of virtual water export. The different variability between green and blue water export was derived by the variance of water footprint, which is dependent on climate features in exporting country.</p> <p>Therefore, we changed the explanation about Figure 1 and focused on the variability of green and blue water export.</p>                                                                                                                                                                                                                                                                                                                                                                                                                                                                                                                                                                                                                                                                                                                                                                                                                                                                                                                                                                                             |
|                         | <p>page 6,<br/>line 3<br/>-<br/>page 6,<br/>line 14</p> | <p>The GVWT is dependent on the water footprint of each country, and a few countries cultivate and export water intensive crops. The different variability between green and blue water export was derived by the variance of water footprint, which is dependent on the climate features in the exporting country. Mekonnen and Hoekstra (2011) also mentioned the difference of water footprint for each country; for example, relatively smaller water footprints of cereal crops were estimated in Northern and Western Europe, rather than in most parts of Africa. In this study, we showed the variability of green and blue water export, respectively, in crop export during the period 2006-2010 (Fig. 1). The dispersion of scattered points of green water export and crop export was smaller than those of blue water export. One of the reasons why a large dispersion was shown in blue water export might be that the volume of blue water is much smaller than that of green water; thus a small amount of blue water might derive a large change in this plot. However, the main issue in Fig. 1 was that the blue water footprint differed more depending on the exporting country, rather than the green water footprint. Therefore, the variability of blue water export was larger than that of green water export, and crop export could bring differing impacts on irrigation water by country.</p> |

| <b>Minor Comments 4</b> |                                                         |                                                                                                                                                                                                                                                                                                                                                                                                                                                                                                                                                                                                                                                                                                                                                                                                                                                                                                                                                                                                    |
|-------------------------|---------------------------------------------------------|----------------------------------------------------------------------------------------------------------------------------------------------------------------------------------------------------------------------------------------------------------------------------------------------------------------------------------------------------------------------------------------------------------------------------------------------------------------------------------------------------------------------------------------------------------------------------------------------------------------------------------------------------------------------------------------------------------------------------------------------------------------------------------------------------------------------------------------------------------------------------------------------------------------------------------------------------------------------------------------------------|
| Reviewer's comments     |                                                         | <p>Fig 2: It seems that a subset of countries and links is plotted.<br/>Please clarify how you select those countries and links.</p>                                                                                                                                                                                                                                                                                                                                                                                                                                                                                                                                                                                                                                                                                                                                                                                                                                                               |
| Response                |                                                         | <p>We added this explanation about the threshold value in order to display the main network. However, we considered entire countries and all links when we calculated volume, connectivity, and centrality indices of GVWT. Fig. 2 indicated the display of the main connection.</p>                                                                                                                                                                                                                                                                                                                                                                                                                                                                                                                                                                                                                                                                                                               |
|                         | <p>page 6,<br/>line 26<br/>-<br/>page 7,<br/>line 2</p> | <p>The GVWT network includes both the volume of virtual water and the connection among countries. Fig. 2 shows only the main GVWT network of food and feed crops in 2010 using the threshold value of virtual water trade, as we could not display these networks with all links, because it is impossible to distinguish each connection between countries. Therefore, we showed the main links that were over a threshold value of 1.0 Gm<sup>3</sup> of total virtual water trade in 2010. Some countries were eliminated from the figure, because they only had connections of virtual water trade that were less than the threshold value. GVWT for food crops has a dispersed network, but GVWT for feed crops is more centralized with a few main exporters, such as the U.S.A., Argentina, Brazil, and China. In other words, the food and feed crop trades have a different structure, and we need to consider not only volume, but also the connectivity of the virtual water trade.</p> |

| Minor Comments 5    |                                              |                                                                                                                                                                                                                                                                                                                                                                                                                                                                                                                                                                                                                                                                                                                                                                                                                                                                                                                                                                                                                                                                                                                                                                                                                                                                                                                                                                                                                                                                                                                                                                                                                                                                                                                                                                                                                                                                                                                                                                                                                                                                                                                                                                                                                                                                                                                                                                                                                                                                                                                               |
|---------------------|----------------------------------------------|-------------------------------------------------------------------------------------------------------------------------------------------------------------------------------------------------------------------------------------------------------------------------------------------------------------------------------------------------------------------------------------------------------------------------------------------------------------------------------------------------------------------------------------------------------------------------------------------------------------------------------------------------------------------------------------------------------------------------------------------------------------------------------------------------------------------------------------------------------------------------------------------------------------------------------------------------------------------------------------------------------------------------------------------------------------------------------------------------------------------------------------------------------------------------------------------------------------------------------------------------------------------------------------------------------------------------------------------------------------------------------------------------------------------------------------------------------------------------------------------------------------------------------------------------------------------------------------------------------------------------------------------------------------------------------------------------------------------------------------------------------------------------------------------------------------------------------------------------------------------------------------------------------------------------------------------------------------------------------------------------------------------------------------------------------------------------------------------------------------------------------------------------------------------------------------------------------------------------------------------------------------------------------------------------------------------------------------------------------------------------------------------------------------------------------------------------------------------------------------------------------------------------------|
| Reviewer's comments |                                              | P6 L33: Please clarify how the volume and connectivity are classified into three groups. In particular, what is the threshold? Why the threshold is as it is?                                                                                                                                                                                                                                                                                                                                                                                                                                                                                                                                                                                                                                                                                                                                                                                                                                                                                                                                                                                                                                                                                                                                                                                                                                                                                                                                                                                                                                                                                                                                                                                                                                                                                                                                                                                                                                                                                                                                                                                                                                                                                                                                                                                                                                                                                                                                                                 |
| Response            |                                              | We added this explanation on manuscript.                                                                                                                                                                                                                                                                                                                                                                                                                                                                                                                                                                                                                                                                                                                                                                                                                                                                                                                                                                                                                                                                                                                                                                                                                                                                                                                                                                                                                                                                                                                                                                                                                                                                                                                                                                                                                                                                                                                                                                                                                                                                                                                                                                                                                                                                                                                                                                                                                                                                                      |
|                     | page 8,<br>line 15<br>-<br>page 9,<br>line 2 | <p>We considered the vulnerability of virtual water trade was more related to the importers who have the larger volume of virtual water import; therefore, the top 10 percentile of total virtual water import was used as the threshold. After that, we classified these countries into 3 groups, according to the top 1, 5, and 10 percentiles of total virtual water import. The small volume group (I) includes countries that imported over the top 10 percentile and below the top 5 percentile of total virtual water import, and the medium group (II) includes the countries that imported over the top 5 percentile, and below the top 1 percentile of total virtual water import. Finally, the large volume group (III) includes countries that imported over the top 1 percentile of total virtual water import.</p> <p>In addition, the vulnerable virtual water trade could be related to the connectivity; therefore, we classified the importers into high, medium, and low connectivity groups, using the degree centrality of links. The importers who have a low degree centrality of links could be regarded as relatively vulnerable importers, and we use the maximum degree centrality of links as the standard for evaluating the connectivity of each country. Therefore, the importers who have the upper one third of maximum degree centrality are classified as the high connectivity group (C), and the importers who have the lower one third of maximum degree centrality are classified as the low connectivity group (A). The importers who are classified in the medium connectivity group have a degree centrality between the upper one third and lower one third of maximum degree centrality. When importers are classified into the A-III sector, we considered that they had intensive virtual water import with vulnerable structure.</p> <p>In food crops, the upper 10% of virtual water import, 25.1 Gm<sup>3</sup> was set as the threshold value, and the upper 5 and 1 percentiles of virtual water import were 37.3 and 72.9 Gm<sup>3</sup>, respectively. Therefore, the importers in the large volume group imported over 72.9 Gm<sup>3</sup> of virtual water during 2006-2010 through food crops. The maximum value of degree centrality was 0.22. Therefore, the high connectivity group included those importers who had a degree centrality between 0.22 and 0.15. The low connectivity group included those importers who had lower than 0.07 degree centrality.</p> |
|                     | page 9,<br>line 9<br>-<br>page 9,<br>line 13 | <p>In feed crops, the upper 10% of virtual water import, 23.8 Gm<sup>3</sup> was set as the threshold value, and the upper 5 and 1 percentiles of virtual water import were 42.3 and 103.6 Gm<sup>3</sup>, respectively. Therefore, the importers in the large volume group imported over 103.6 Gm<sup>3</sup> of virtual water during 2006-2010 through food crops. The maximum value of degree centrality was 0.17. Therefore, the high connectivity group included importers who had a degree centrality between 0.17 and 0.11. The low connectivity group included the importers who had lower than 0.06 degree centrality.</p>                                                                                                                                                                                                                                                                                                                                                                                                                                                                                                                                                                                                                                                                                                                                                                                                                                                                                                                                                                                                                                                                                                                                                                                                                                                                                                                                                                                                                                                                                                                                                                                                                                                                                                                                                                                                                                                                                           |

| Minor Comments 6    |                                               |                                                                                                                                                                                                                                                                                                                                                                                                                                                                                                                                                                                                                                                                                                                                                                                                                                                                                                                                                                                                                                                                                                                                                                                                                                                                                                                                                                                                                                                                                                                                                                                                                                                                                                                                                                                                                                                                                                                                                                                                                                                                                                                                                                                                                                                                                                                                                                                                                                                                                                                                                          |
|---------------------|-----------------------------------------------|----------------------------------------------------------------------------------------------------------------------------------------------------------------------------------------------------------------------------------------------------------------------------------------------------------------------------------------------------------------------------------------------------------------------------------------------------------------------------------------------------------------------------------------------------------------------------------------------------------------------------------------------------------------------------------------------------------------------------------------------------------------------------------------------------------------------------------------------------------------------------------------------------------------------------------------------------------------------------------------------------------------------------------------------------------------------------------------------------------------------------------------------------------------------------------------------------------------------------------------------------------------------------------------------------------------------------------------------------------------------------------------------------------------------------------------------------------------------------------------------------------------------------------------------------------------------------------------------------------------------------------------------------------------------------------------------------------------------------------------------------------------------------------------------------------------------------------------------------------------------------------------------------------------------------------------------------------------------------------------------------------------------------------------------------------------------------------------------------------------------------------------------------------------------------------------------------------------------------------------------------------------------------------------------------------------------------------------------------------------------------------------------------------------------------------------------------------------------------------------------------------------------------------------------------------|
| Reviewer's comments |                                               | P7 L15-22: Discussion about water savings is irrelevant to this part, which focuses on vulnerability. Please take it out.                                                                                                                                                                                                                                                                                                                                                                                                                                                                                                                                                                                                                                                                                                                                                                                                                                                                                                                                                                                                                                                                                                                                                                                                                                                                                                                                                                                                                                                                                                                                                                                                                                                                                                                                                                                                                                                                                                                                                                                                                                                                                                                                                                                                                                                                                                                                                                                                                                |
| Response            |                                               | We added the new chapter which is "3.2.3 GVWT impacts on water savings in importing countries", and moved the discussion about water savings to this new chapter.                                                                                                                                                                                                                                                                                                                                                                                                                                                                                                                                                                                                                                                                                                                                                                                                                                                                                                                                                                                                                                                                                                                                                                                                                                                                                                                                                                                                                                                                                                                                                                                                                                                                                                                                                                                                                                                                                                                                                                                                                                                                                                                                                                                                                                                                                                                                                                                        |
|                     | page 9,<br>line 20<br>-<br>page 10,<br>line 8 | <p><b>3.2.3 GVWT impacts on water savings in importing countries</b></p> <p>Virtual water trade could help the importers save water resources by crops import. For example, if the importing country replaces crop import with domestic production, this will be accompanied by additional water use. Table 4 shows the water savings by virtual water import in main importers from 2006 to 2010. China and Japan saved 24.7 and 18.7 Gm<sup>3</sup>/yr of green water, respectively, by crops import. In addition, Egypt and Iran saved 15.3 and 10.1 Gm<sup>3</sup>/yr of blue water, respectively, by crops import, because these countries depended on the irrigation water for domestic crop production. In particular, Egypt and Iran have few water resources; therefore, the virtual water impacts on water resource savings in these countries might be larger than on other importers.</p> <p>Accordingly, VWT is a very important issue for these importers; thus the vulnerable structure of VWT could cause water shortage problems to importing countries. For example, in 2010, Russia banned wheat export because of severe drought, and the global wheat price rose. Oxfam Research Reports analyzed the impacts of the Russia ban of wheat export on global and local areas in terms of economic impacts (Welton, 2011). Wheat import in Egypt has high dependency on the Russian federation's export, which we regarded as a vulnerable structure, and the insufficient import of crops due to the export ban in the Russian federation could also bring not only economic impacts, but also serious water consumption for increasing domestic food production. Chapagatin et al. (2006) found the import of wheat in Egypt contributed to a national water saving of 3.6 Gm<sup>3</sup>/yr during 1997-2001, which according to the 1959 agreement was about seven percent of the total volume of water that Egypt was entitled to. Fader et al. (2011) also found that some water-scarce countries, such as China and Mexico, but also the Netherlands and Japan, would need relatively high amounts of water to produce the goods they otherwise import, i.e. they save high amounts of water by importing goods. Therefore, if they stopped importing and exporting agricultural products, these countries would need to use more water in their agricultural sectors (Fader et al., 2011). In other words, a vulnerable trade structure with low connectivity could be one of the main reasons for water shortage problems.</p> |
