# Supplementary material for: Analysis of the characteristics of global virtual water trade network using degree and eigenvector centrality, with a focus on food and feed crops
Source: Copernicus journal article supplement (doi:10.5194/hess-2016-211), 2016-05-23
Supplement: Supplementary file [file hess-2016-211-AC2-supplement.zip]

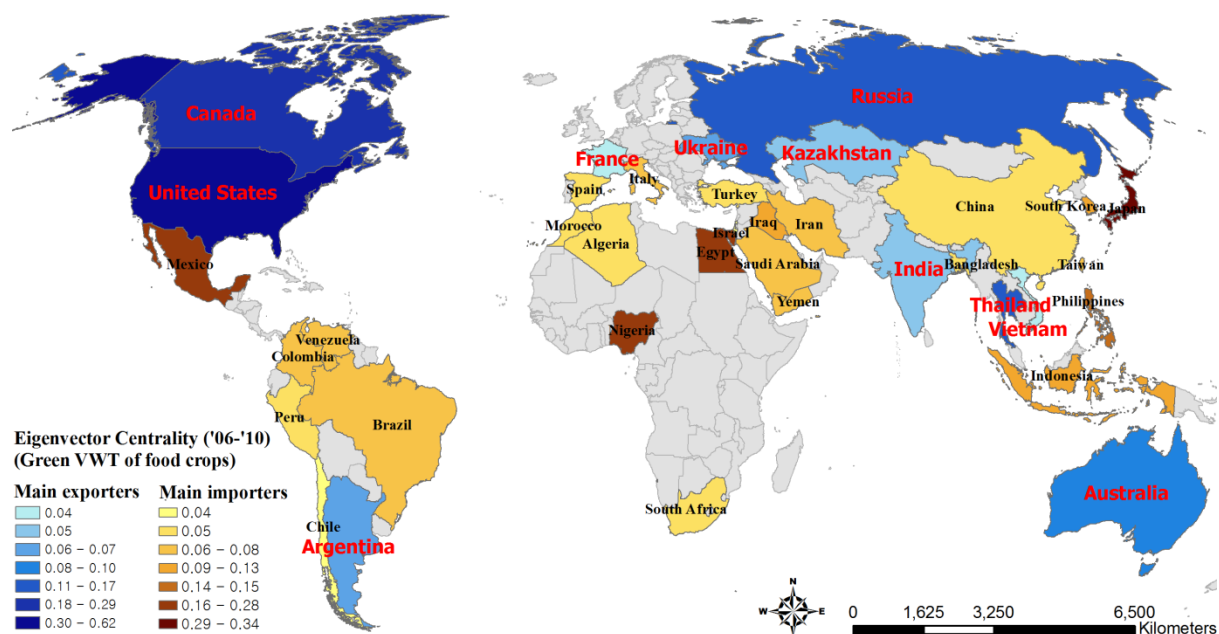

(a) Green virtual water trade in GVWT

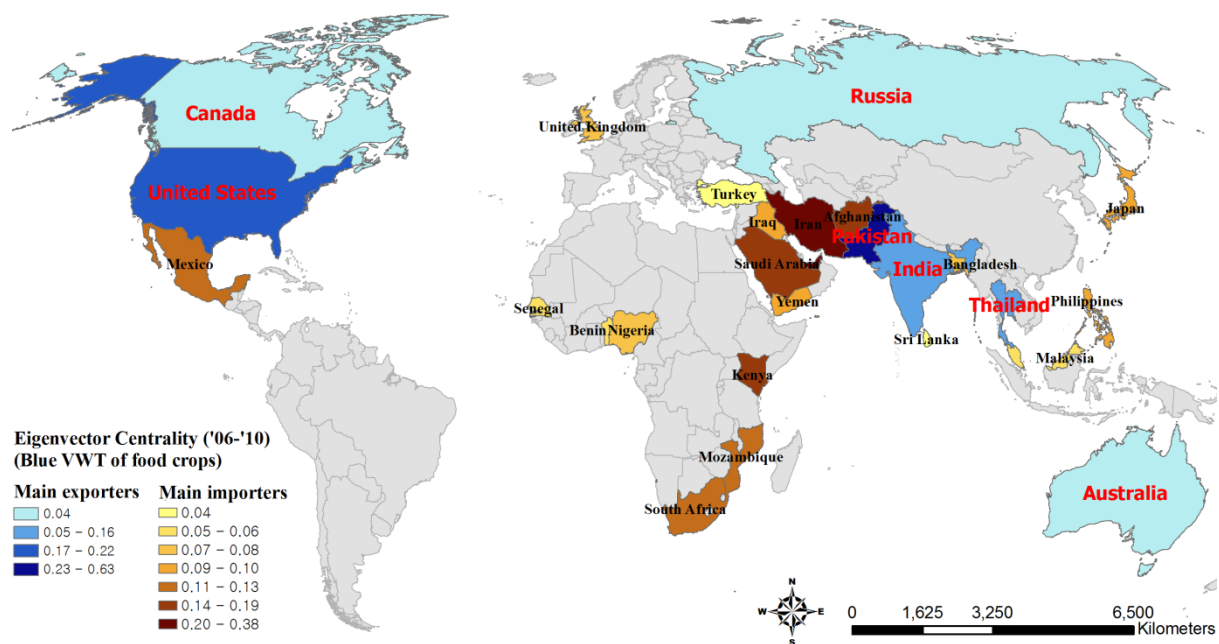

(b) Blue virtual water trade in GVWT

**Figure A-1: Eigenvector centrality of the main exporters and importers in GVWT during period 2006-2010 (Food crops) (Above-average amount virtual water imported or exported).**

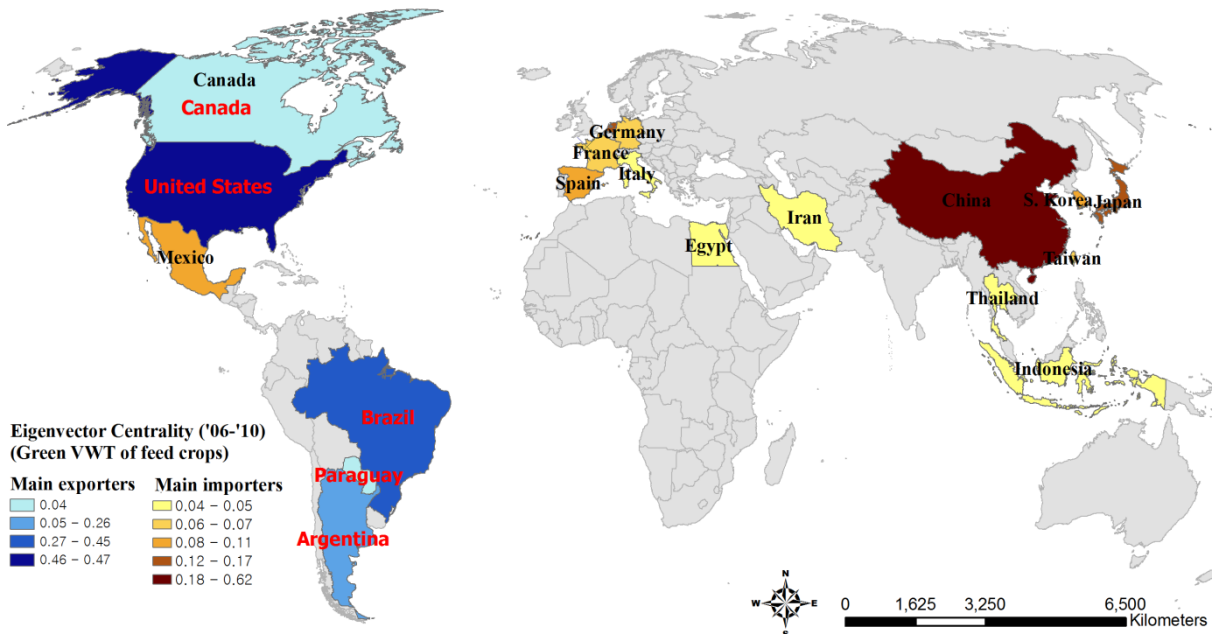

(a) Green virtual water trade in GVWT

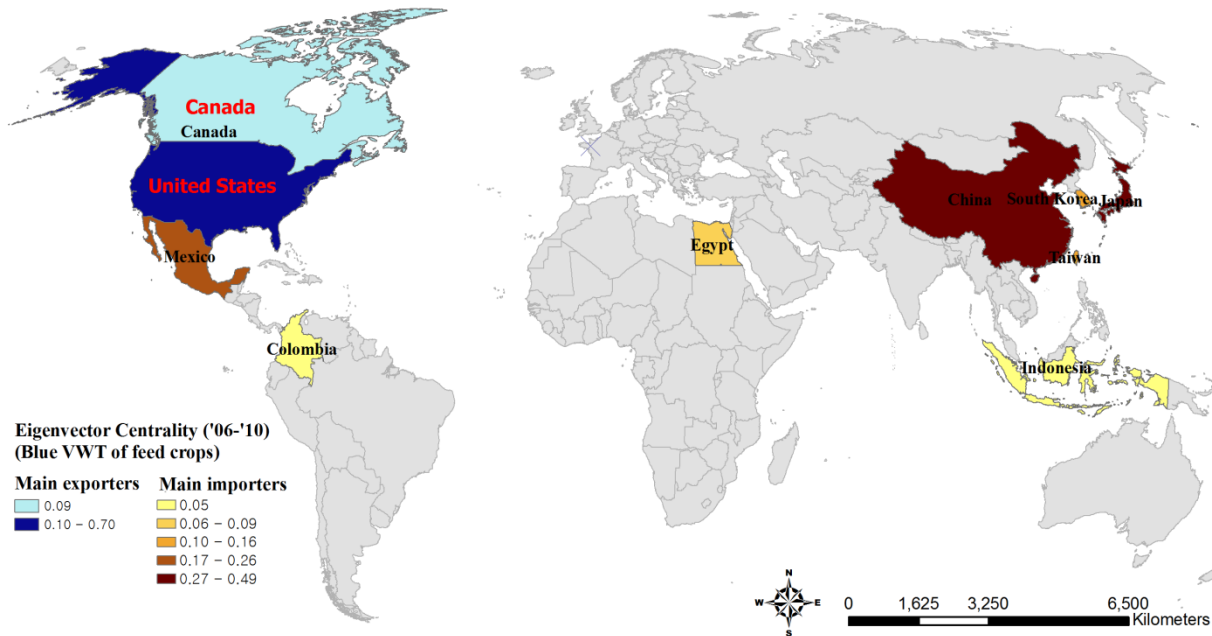

(b) Blue virtual water trade in GVWT

**Figure A-2: Eigenvector centrality of the main exporters and importers in GVWT during period 2006-2010 (Feed crops) (Above-average amount virtual water imported or exported).**

Table A-1: Total exports of crops and virtual water during the period 2006-2010.

| Crops         |                                | Main Exporters | Export<br>(Mton) | Virtual water export (Gm³) |            |             |
|---------------|--------------------------------|----------------|------------------|----------------------------|------------|-------------|
|               |                                |                |                  | Green water                | Blue water | Total water |
| Food<br>crops | Wheat                          | USA            | 152.0            | 284.2                      | 14.0       | 298.2       |
|               |                                | CANADA         | 101.0            | 135.0                      | 0.5        | 135.5       |
|               |                                | FRANCE         | 85.2             | 49.5                       | 0.1        | 49.7        |
|               |                                | RUSSIAN FED    | 64.5             | 148.3                      | 2.0        | 150.3       |
|               |                                | ARGENTINA      | 37.3             | 66.0                       | 0.4        | 66.4        |
|               |                                | GERMANY        | 36.6             | 21.9                       | 0.0        | 21.9        |
|               |                                | Total          | 674.9            | 1023.8                     | 34.0       | 1057.8      |
|               | Rice                           | THAILAND       | 44.4             | 117.1                      | 24.1       | 141.2       |
|               |                                | USA            | 19.9             | 10.5                       | 21.0       | 31.5        |
|               |                                | VIET NAM       | 19.9             | 29.4                       | 4.6        | 34.0        |
|               |                                | INDIA          | 18.8             | 37.8                       | 12.3       | 50.1        |
|               |                                | PAKISTAN       | 16.7             | 16.1                       | 53.0       | 69.1        |
|               |                                | CHINA          | 4.9              | 3.8                        | 1.7        | 5.5         |
|               |                                | Total          | 148.8            | 246.9                      | 136.7      | 383.5       |
|               | Barley                         | FRANCE         | 24.9             | 13.2                       | 0.1        | 13.3        |
|               |                                | UKRAINE        | 22.7             | 31.9                       | 0.4        | 32.3        |
|               |                                | AUSTRALIA      | 13.9             | 22.8                       | 1.1        | 23.9        |
|               |                                | RUSSIAN FED    | 9.7              | 21.3                       | 0.5        | 21.8        |
|               |                                | GERMANY        | 9.4              | 4.7                        | 0.7        | 5.5         |
|               |                                | CANADA         | 9.4              | 8.4                        | 0.1        | 8.4         |
|               |                                | Total          | 124.9            | 136.1                      | 5.3        | 141.3       |
|               | Others<br>(Rye and<br>Sorghum) | USA            | 18.3             | 19.7                       | 1.3        | 21.1        |
|               |                                | ARGENTINA      | 5.2              | 5.4                        | 0.1        | 5.5         |
|               |                                | GERMANY        | 3.9              | 3.4                        | 0.2        | 3.5         |
|               |                                | POLAND         | 1.7              | 2.3                        | 0.0        | 2.3         |
|               |                                | Total          | 37.0             | 46.3                       | 2.1        | 48.4        |
| Feed<br>crops | Maize                          | USA            | 284.5            | 148.7                      | 18.0       | 166.7       |
|               |                                | ARGENTINA      | 66.8             | 69.9                       | 0.9        | 70.8        |
|               |                                | BRAZIL         | 39.9             | 64.7                       | 0.0        | 64.7        |
|               |                                | FRANCE         | 30.3             | 12.9                       | 2.8        | 15.7        |
|               |                                | HUNGARY        | 18.9             | 12.0                       | 0.0        | 12.0        |
|               |                                | UKRAINE        | 16.7             | 17.7                       | 1.4        | 19.1        |
|               |                                | Total          | 531.2            | 423.0                      | 28.5       | 451.5       |
|               | Beans<br>crops                 | USA            | 230.2            | 348.6                      | 20.7       | 369.3       |
|               |                                | BRAZIL         | 193.8            | 399.4                      | 0.2        | 399.6       |
|               |                                | ARGENTINA      | 169.0            | 311.2                      | 0.8        | 312.0       |
|               |                                | INDIA          | 23.8             | 83.7                       | 0.5        | 84.2        |
|               |                                | NETHERLANDS    | 23.3             | 41.1                       | 1.4        | 42.6        |
|               |                                | PARAGUAY       | 21.8             | 51.8                       | 0.0        | 51.8        |
|               |                                | Total          | 712.6            | 1329.6                     | 30.8       | 1360.4      |

Table A-2: Total imports of crops and virtual water during the period 2006-2010.

| Crops         |                                | Main Importers  | Import<br>(Mton) | Virtual water import (Gm <sup>3</sup> ) |            |             |
|---------------|--------------------------------|-----------------|------------------|-----------------------------------------|------------|-------------|
|               |                                |                 |                  | Green water                             | Blue water | Total water |
| Food<br>crops | Wheat                          | EGYPT           | 43.9             | 82.7                                    | 2.0        | 84.7        |
|               |                                | ITALY           | 33.8             | 37.4                                    | 1.7        | 39.1        |
|               |                                | BRAZIL          | 30.2             | 53.7                                    | 1.3        | 55.0        |
|               |                                | JAPAN           | 28.3             | 49.5                                    | 1.9        | 51.4        |
|               |                                | ALGERIA         | 28.2             | 23.9                                    | 1.4        | 25.3        |
|               |                                | SPAIN           | 24.7             | 27.0                                    | 0.7        | 27.7        |
|               |                                | Total           | 674.9            | 1023.8                                  | 34.0       | 1057.8      |
|               | Rice                           | PHILIPPINES     | 8.8              | 14.7                                    | 3.9        | 18.7        |
|               |                                | COTE DIVOIRE    | 6.1              | 11.6                                    | 5.3        | 16.8        |
|               |                                | SAUDI ARABIA    | 5.4              | 9.5                                     | 5.6        | 15.1        |
|               |                                | NIGERIA         | 5.4              | 12.8                                    | 3.2        | 16.0        |
|               |                                | UNITED ARAB EM. | 5.1              | 8.2                                     | 8.4        | 16.6        |
|               |                                | IRAN ISLAM. REP | 5.0              | 8.8                                     | 6.5        | 15.4        |
|               |                                | Total           | 148.8            | 246.9                                   | 136.7      | 383.5       |
|               | Barley                         | SAUDI ARABIA    | 35.8             | 50.0                                    | 1.8        | 51.8        |
|               |                                | NETHERLANDS     | 9.6              | 5.1                                     | 0.3        | 5.4         |
|               |                                | GERMANY         | 8.6              | 4.9                                     | 0.2        | 5.1         |
|               |                                | BELGIUM         | 7.0              | 3.8                                     | 0.1        | 3.8         |
|               |                                | CHINA           | 6.7              | 8.2                                     | 0.3        | 8.5         |
|               |                                | JAPAN           | 6.2              | 8.0                                     | 0.5        | 8.6         |
|               |                                | Total           | 124.9            | 136.1                                   | 5.3        | 141.3       |
|               | Others<br>(Rye and<br>Sorghum) | MEXICO          | 9.2              | 9.8                                     | 0.6        | 10.4        |
|               |                                | JAPAN           | 5.9              | 6.5                                     | 0.3        | 6.8         |
|               |                                | SPAIN           | 4.3              | 4.1                                     | 0.2        | 4.3         |
|               |                                | NETHERLANDS     | 2.4              | 3.8                                     | 0.1        | 4.0         |
|               |                                | Total           | 37.0             | 46.3                                    | 2.1        | 48.4        |
| Feed<br>crops | Maize                          | JAPAN           | 86.7             | 48.0                                    | 5.4        | 53.4        |
|               |                                | KOREA REP.      | 45.1             | 29.6                                    | 2.7        | 32.3        |
|               |                                | MEXICO          | 43.4             | 22.8                                    | 2.7        | 25.5        |
|               |                                | EGYPT           | 25.7             | 18.3                                    | 1.8        | 20.1        |
|               |                                | SPAIN           | 23.9             | 22.0                                    | 1.3        | 23.3        |
|               |                                | TAIWAN (POC)    | 23.2             | 16.4                                    | 1.4        | 17.8        |
|               |                                | Total           | 531.2            | 423.0                                   | 28.5       | 451.5       |
|               | Beans<br>crops                 | CHINA           | 203.2            | 383.3                                   | 9.0        | 392.3       |
|               |                                | NETHERLANDS     | 49.5             | 92.3                                    | 0.7        | 93.1        |
|               |                                | GERMANY         | 31.8             | 57.2                                    | 1.5        | 58.7        |
|               |                                | SPAIN           | 31.4             | 59.1                                    | 0.5        | 59.6        |
|               |                                | JAPAN           | 29.5             | 55.6                                    | 2.5        | 58.2        |
|               |                                | MEXICO          | 26.0             | 39.1                                    | 2.3        | 41.4        |
|               |                                | Total           | 712.6            | 1329.6                                  | 30.8       | 1360.4      |

**Table A-3: Out-degree centrality of GVWT during the period 2006-2010.**

| Crops             | Countries                 | Weighted network by volume of GVWT |       | Connection network of GVWT |       |
|-------------------|---------------------------|------------------------------------|-------|----------------------------|-------|
|                   |                           | Out-degree centrality              | Rank* | Out-degree centrality      | Rank* |
| <b>Food crops</b> | <b>USA</b>                | 1.64                               | 1     | 0.74                       | 1     |
|                   | <b>RUSSIAN FEDERATION</b> | 0.81                               | 2     | 0.41                       | 11    |
|                   | <b>CANADA</b>             | 0.68                               | 3     | 0.41                       | 8     |
|                   | <b>THAILAND</b>           | 0.66                               | 4     | 0.65                       | 2     |
|                   | <b>AUSTRALIA</b>          | 0.44                               | 5     | 0.28                       | 15    |
|                   | <b>KAZAKHSTAN</b>         | 0.41                               | 6     | 0.27                       | 17    |
|                   | <b>UKRAINE</b>            | 0.41                               | 7     | 0.42                       | 7     |
|                   | <b>ARGENTINA</b>          | 0.38                               | 8     | 0.41                       | 10    |
|                   | <b>PAKISTAN</b>           | 0.33                               | 9     | 0.56                       | 3     |
|                   | <b>FRANCE</b>             | 0.30                               | 10    | 0.41                       | 9     |
|                   | <b>INDIA</b>              | 0.24                               | 11    | 0.47                       | 5     |
|                   | <b>VIET NAM</b>           | 0.16                               | 12    | 0.50                       | 4     |
|                   | <b>GERMANY</b>            | 0.15                               | 13    | 0.42                       | 6     |
|                   | <b>ROMANIA</b>            | 0.07                               | 14    | 0.25                       | 18    |
|                   | <b>BRAZIL</b>             | 0.06                               | 15    | 0.34                       | 13    |
| <b>Feed crops</b> | <b>USA</b>                | 2.49                               | 1     | 0.60                       | 1     |
|                   | <b>BRAZIL</b>             | 2.16                               | 2     | 0.42                       | 3     |
|                   | <b>ARGENTINA</b>          | 1.78                               | 3     | 0.52                       | 2     |
|                   | <b>INDIA</b>              | 0.51                               | 4     | 0.34                       | 4     |
|                   | <b>PARAGUAY</b>           | 0.33                               | 5     | 0.24                       | 7     |
|                   | <b>NETHERLANDS</b>        | 0.20                               | 6     | 0.20                       | 10    |
|                   | <b>UKRAINE</b>            | 0.11                               | 7     | 0.27                       | 6     |
|                   | <b>CHINA</b>              | 0.10                               | 8     | 0.17                       | 14    |
|                   | <b>CANADA</b>             | 0.09                               | 9     | 0.30                       | 5     |
|                   | <b>FRANCE</b>             | 0.08                               | 10    | 0.24                       | 8     |
|                   | <b>BOLIVIA</b>            | 0.06                               | 11    | 0.03                       | 52    |
|                   | <b>GERMANY</b>            | 0.06                               | 12    | 0.16                       | 15    |
|                   | <b>HUNGARY</b>            | 0.06                               | 13    | 0.18                       | 13    |
|                   | <b>BELGIUM</b>            | 0.05                               | 14    | 0.18                       | 12    |
|                   | <b>SOUTH AFRICA</b>       | 0.04                               | 15    | 0.21                       | 9     |

\* The higher rank (1) indicated the larger degree centrality

**Table A-4: In-degree centrality of GVWT during the period 2006-2010.**

| Crops             | Countries           | Weighted network by volume of GVWT |       | Connection network of GVWT |      |
|-------------------|---------------------|------------------------------------|-------|----------------------------|------|
|                   |                     | In-degree centrality               | Rank* | In-degree centrality       | Rank |
| <b>Food crops</b> | <b>EGYPT</b>        | 0.40                               | 1     | 0.14                       | 21   |
|                   | <b>JAPAN</b>        | 0.34                               | 2     | 0.11                       | 33   |
|                   | <b>SAUDI ARABIA</b> | 0.34                               | 3     | 0.20                       | 5    |
|                   | <b>BRAZIL</b>       | 0.30                               | 4     | 0.08                       | 68   |
|                   | <b>NIGERIA</b>      | 0.23                               | 5     | 0.12                       | 32   |
|                   | <b>MEXICO</b>       | 0.23                               | 6     | 0.03                       | 144  |
|                   | <b>IRAN</b>         | 0.22                               | 7     | 0.10                       | 47   |
|                   | <b>PHILIPPINES</b>  | 0.21                               | 8     | 0.09                       | 56   |
|                   | <b>ITALY</b>        | 0.20                               | 9     | 0.22                       | 1    |
|                   | <b>INDONESIA</b>    | 0.19                               | 10    | 0.09                       | 55   |
|                   | <b>IRAQ</b>         | 0.17                               | 11    | 0.10                       | 46   |
|                   | <b>SPAIN</b>        | 0.17                               | 12    | 0.19                       | 7    |
|                   | <b>BANGLADESH</b>   | 0.16                               | 13    | 0.11                       | 42   |
|                   | <b>TURKEY</b>       | 0.16                               | 14    | 0.20                       | 6    |
|                   | <b>KOREA REP.</b>   | 0.15                               | 15    | 0.09                       | 60   |
| <b>Feed crops</b> | <b>CHINA</b>        | 1.83                               | 1     | 0.08                       | 27   |
|                   | <b>JAPAN</b>        | 0.52                               | 2     | 0.11                       | 9    |
|                   | <b>NETHERLANDS</b>  | 0.48                               | 3     | 0.17                       | 1    |
|                   | <b>SPAIN</b>        | 0.39                               | 4     | 0.14                       | 5    |
|                   | <b>MEXICO</b>       | 0.31                               | 5     | 0.04                       | 80   |
|                   | <b>GERMANY</b>      | 0.30                               | 6     | 0.14                       | 4    |
|                   | <b>KOREA REP.</b>   | 0.30                               | 7     | 0.10                       | 14   |
|                   | <b>ITALY</b>        | 0.22                               | 8     | 0.16                       | 3    |
|                   | <b>INDONESIA</b>    | 0.21                               | 9     | 0.09                       | 22   |
|                   | <b>FRANCE</b>       | 0.20                               | 10    | 0.16                       | 2    |
|                   | <b>TAIWAN</b>       | 0.19                               | 11    | 0.07                       | 39   |
|                   | <b>IRAN</b>         | 0.19                               | 12    | 0.08                       | 30   |
|                   | <b>THAILAND</b>     | 0.18                               | 13    | 0.08                       | 34   |
|                   | <b>VIET NAM</b>     | 0.18                               | 14    | 0.08                       | 28   |
|                   | <b>EGYPT</b>        | 0.17                               | 15    | 0.08                       | 29   |

\* The higher rank (1) indicated the larger degree centrality
